# Supplementary material for: Effects of NiO addition on sintering and proton uptake of Ba(Zr,Ce,Y)O3−δ
Source: Royal Society of Chemistry journal article supplement (doi:10.1039/d1ta02555d), 2021-01-01
Supplement: d1ta02555d1.pdf [file d1ta02555d1.pdf]

## NiO addition effects on Ba(Zr, Ce, Y)O<sub>3-δ</sub>: sintering behavior and proton uptake

Yuanye Huang <sup>1, #</sup>, Rotraut Merkle <sup>1</sup>, Joachim Maier <sup>1</sup>

<sup>1</sup> Max Planck Institute for Solid State Research, Heisenbergstraße 1, Stuttgart, 70569, Germany

<sup>#</sup> present address: Empa, Swiss Federal Laboratories for Materials Science and Technology, Überlandstraße 129, 8600, Dübendorf, Switzerland

### Supplementary Information

Table S1: Composition of pellets sintered by SSRS, and SPS with Ni on B site. SSRS samples were sintered at 1550 °C 4 h. SPS samples were sintered at 1350 °C and 1300 °C for 1 at% and 4 at% Ni and annealed at 1400 °C 4 h.

| Nominal Composition | Measurement by ICP-OES / wt. % |              |              |               |                 | Real composition                                                                                                                   | A: B ratio |
|---------------------|--------------------------------|--------------|--------------|---------------|-----------------|------------------------------------------------------------------------------------------------------------------------------------|------------|
|                     | Ba                             | Zr           | Ce           | Y             | Ni              |                                                                                                                                    |            |
| BZC20Y13.6-0.125Ni  | 48.5<br>±0.5                   | 20.7<br>±0.3 | 9.61<br>±0.1 | 4.12<br>±0.05 | 0.126<br>±0.009 | Ba <sub>1.02</sub> Zr <sub>0.66</sub> Ce <sub>0.20</sub> Y <sub>0.13</sub> Hf <sub>0.01</sub> O <sub>3-δ</sub><br>+ 0.16 wt. % NiO | 1.02       |
| BZC20Y13.6-0.25Ni   | 48.4<br>±0.5                   | 20.5<br>±0.3 | 9.69<br>±0.1 | 4.11<br>±0.05 | 0.163<br>±0.01  | Ba <sub>1.03</sub> Zr <sub>0.66</sub> Ce <sub>0.20</sub> Y <sub>0.13</sub> Hf <sub>0.01</sub> O <sub>3-δ</sub><br>+ 0.21 wt. % NiO | 1.03       |
| BZC20Y13.6-0.375Ni  | 48.2<br>±0.5                   | 21.5<br>±0.3 | 9.02<br>±0.1 | 4.59<br>±0.06 | 0.344<br>±0.01  | Ba <sub>0.99</sub> Zr <sub>0.67</sub> Ce <sub>0.18</sub> Y <sub>0.15</sub> Hf <sub>0.01</sub> O <sub>3-δ</sub><br>+ 0.44 wt. % NiO | 0.99       |
| BZC20Y13.6-0.5Ni    | 48.2<br>±0.5                   | 20.6<br>±0.3 | 9.55<br>±0.1 | 4.01<br>±0.09 | 0.35<br>±0.03   | Ba <sub>1.03</sub> Zr <sub>0.66</sub> Ce <sub>0.20</sub> Y <sub>0.13</sub> Hf <sub>0.01</sub> O <sub>3-δ</sub><br>+ 0.45 wt. % NiO | 1.03       |
| BZC20Y13.6-1.0Ni    | 48.2<br>±0.5                   | 20.7<br>±0.3 | 9.78<br>±0.1 | 4.01<br>±0.05 | 0.41<br>±0.03   | Ba <sub>1.01</sub> Zr <sub>0.66</sub> Ce <sub>0.20</sub> Y <sub>0.13</sub> Hf <sub>0.01</sub> O <sub>3-δ</sub><br>+ 0.52 wt. % NiO | 1.02       |
| BZC20Y13.6Ni1-SPS   | 48.0<br>±0.5                   | 20.6<br>±0.3 | 9.85<br>±0.1 | 4.56<br>±0.09 | 0.25<br>±0.01   | Ba <sub>0.99</sub> Zr <sub>0.64</sub> Ce <sub>0.20</sub> Y <sub>0.14</sub> Ni <sub>0.01</sub> Hf <sub>0.01</sub> O <sub>3-δ</sub>  | 0.99       |
| BZC20Y13.6Ni4-SPS   | 47.8<br>±0.5                   | 20.1<br>±0.3 | 9.88<br>±0.1 | 4.47<br>±0.09 | 0.56<br>±0.04   | Ba <sub>0.99</sub> Zr <sub>0.62</sub> Ce <sub>0.20</sub> Y <sub>0.14</sub> Ni <sub>0.03</sub> Hf <sub>0.01</sub> O <sub>3-δ</sub>  | 0.99       |

Table S2: Composition of BZCY with 1.0 wt% NiO addition sintered at 1550 °C for different time.

| Sintering time / h | Measurement by ICP-OES / wt. % |      |      |       |        | Real composition                                                                                               | A: B ratio |
|--------------------|--------------------------------|------|------|-------|--------|----------------------------------------------------------------------------------------------------------------|------------|
|                    | Ba                             | Zr   | Ce   | Y     | Ni     |                                                                                                                |            |
| 1                  | 48.2                           | 21.6 | 9.68 | 4.19  | 0.487  | Ba <sub>0.99</sub> Zr <sub>0.67</sub> Ce <sub>0.19</sub> Y <sub>0.13</sub> Hf <sub>0.01</sub> O <sub>3-δ</sub> | 0.99       |
|                    | ±0.5                           | ±0.3 | ±0.1 | ±0.06 | ±0.005 | + 0.62 wt. % NiO                                                                                               |            |
| 4                  | 48.2                           | 20.7 | 9.78 | 4.01  | 0.41   | Ba <sub>1.02</sub> Zr <sub>0.66</sub> Ce <sub>0.20</sub> Y <sub>0.13</sub> Hf <sub>0.01</sub> O <sub>3-δ</sub> | 1.02       |
|                    | ±0.5                           | ±0.3 | ±0.1 | ±0.05 | ±0.03  | + 0.52 wt. % NiO                                                                                               |            |
| 16                 | 48.1                           | 20.8 | 9.67 | 4.19  | 0.377  | Ba <sub>1.01</sub> Zr <sub>0.66</sub> Ce <sub>0.20</sub> Y <sub>0.14</sub> Hf <sub>0.01</sub> O <sub>3-δ</sub> | 1.01       |
|                    | ±0.5                           | ±0.3 | ±0.1 | ±0.17 | ±0.007 | + 0.48 wt. % NiO                                                                                               |            |

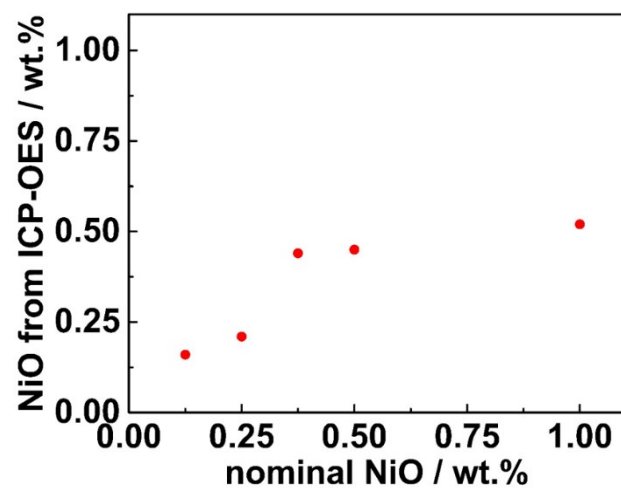

Figure S1: Actual NiO content of SSRS samples sintered at 1550 °C 4h from ICP-OES.

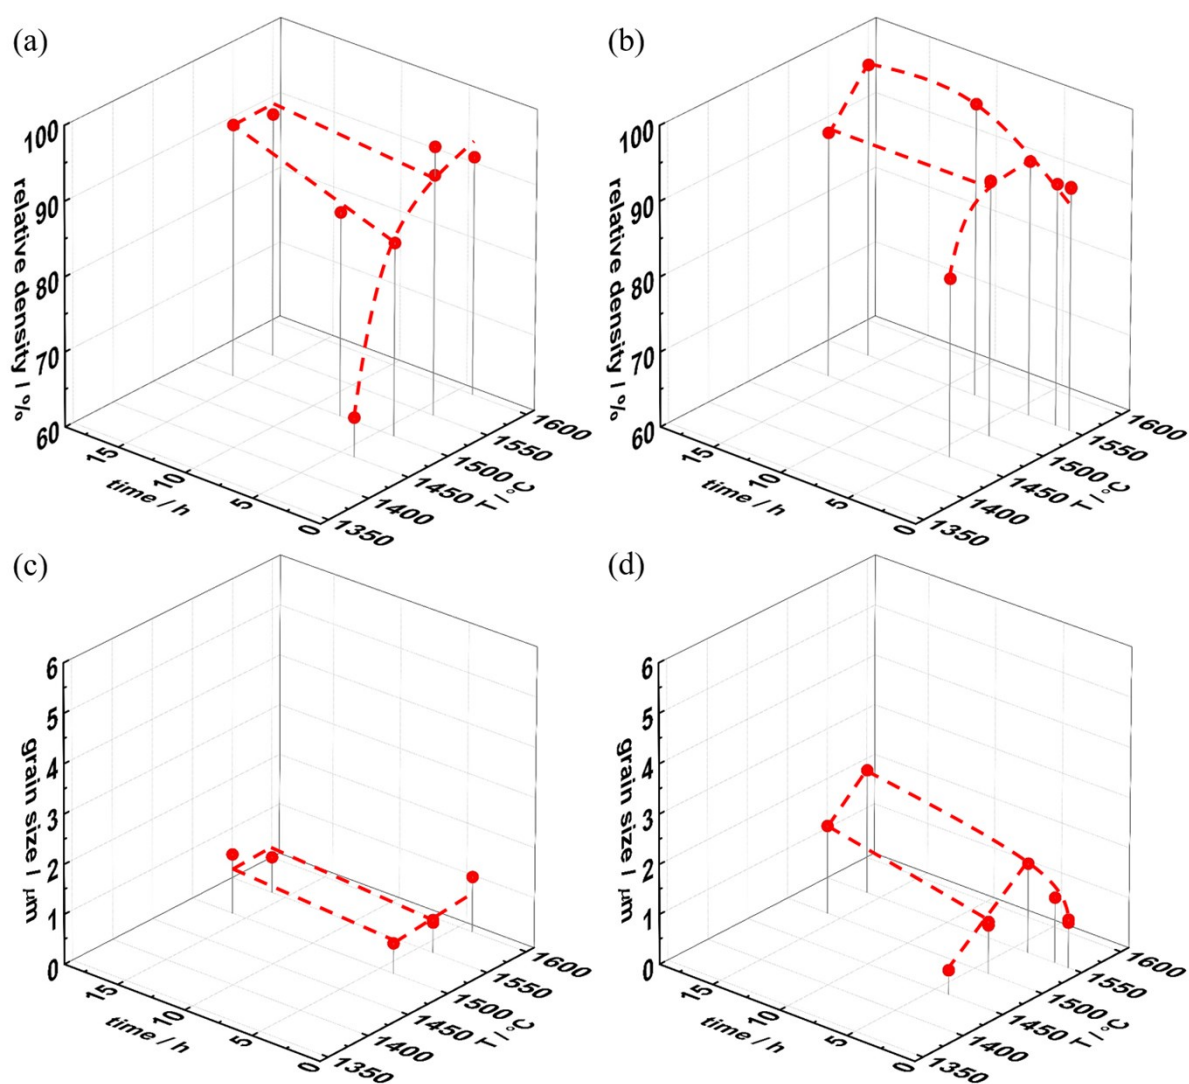

Figure S2: Relative density (top) and grain size (bottom) as function of sintering temperature and soaking time with (a,c) 0.125 wt% NiO, and (b,d) 0.375 wt% NiO. The dashed lines are only a guide to the eye.

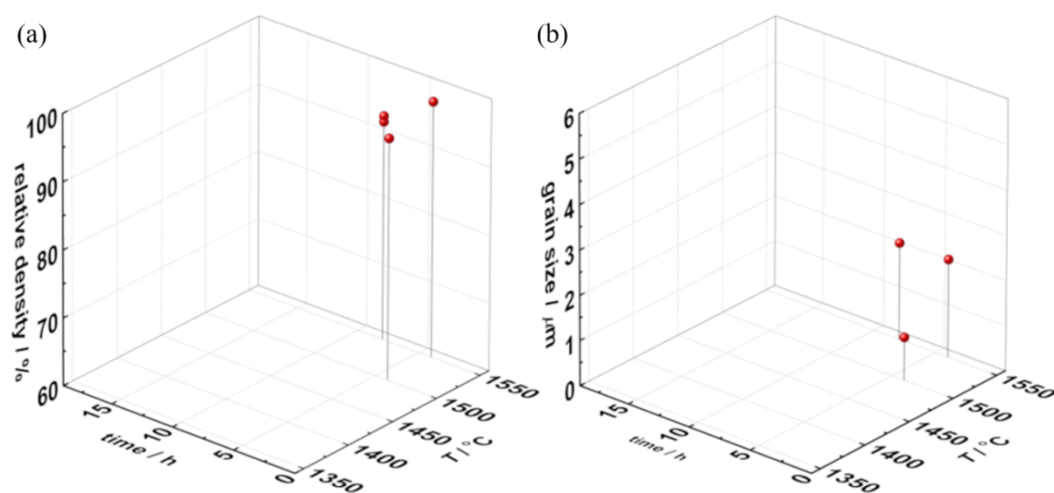

Figure S3: (a) relative density and (b) grain size as function of sintering temperature and soaking time for sample doped with 17.5 at% Y and 0.5 wt% NiO addition.

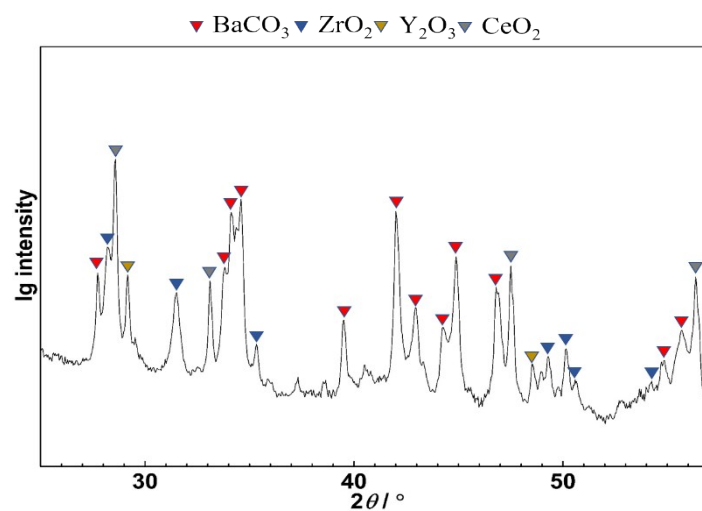

Figure S4: XRD pattern of the wet ball milled powder from the sample with 2.0 wt% NiO addition.

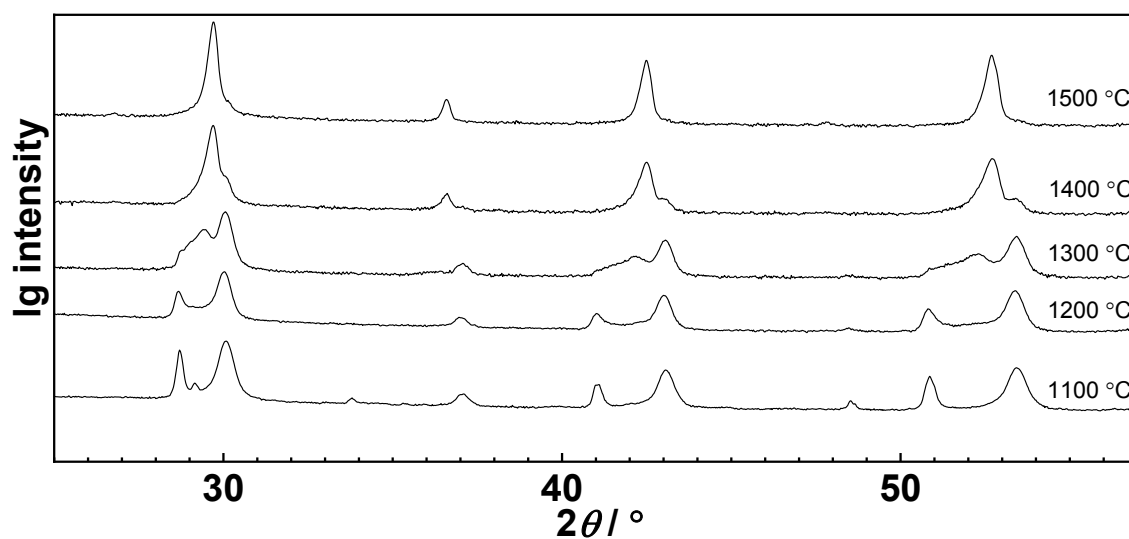

Figure S5: XRD patterns of BZCY with 0.5 wt% NiO addition sintered at different  $T$  for 10 min.

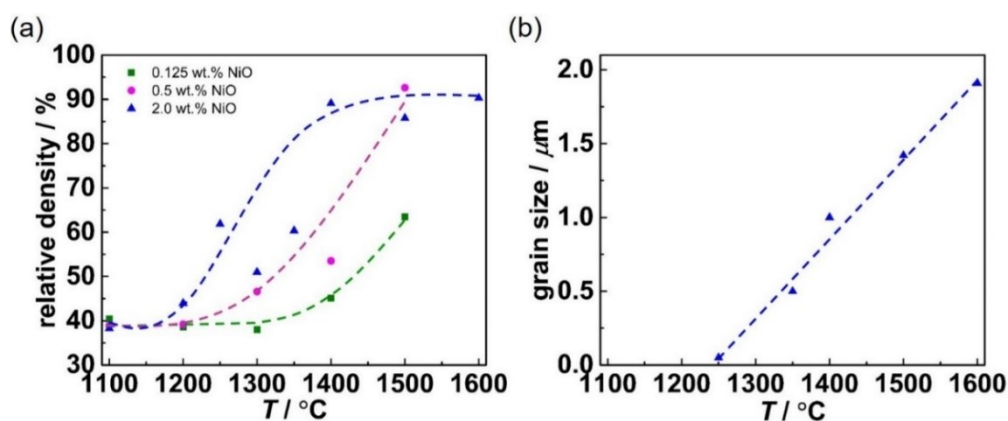

Figure S6: Evolution of grain size and density with temperature for the quenched samples of Fig. 6-7.

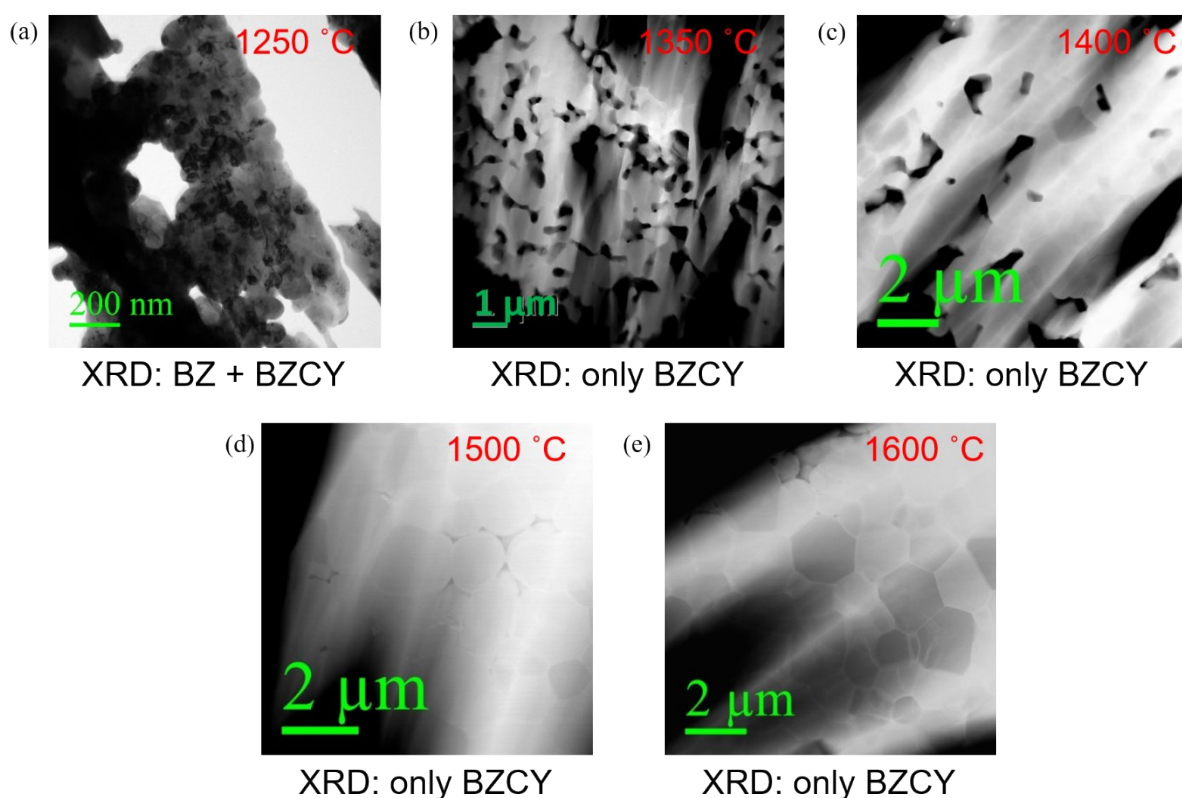

Figure S7: (a) BF image from 1250 °C and (b-e) HAADF images from quenched BZCY with 2.0 wt% NiO addition samples sintered for 10 min at different temperatures.

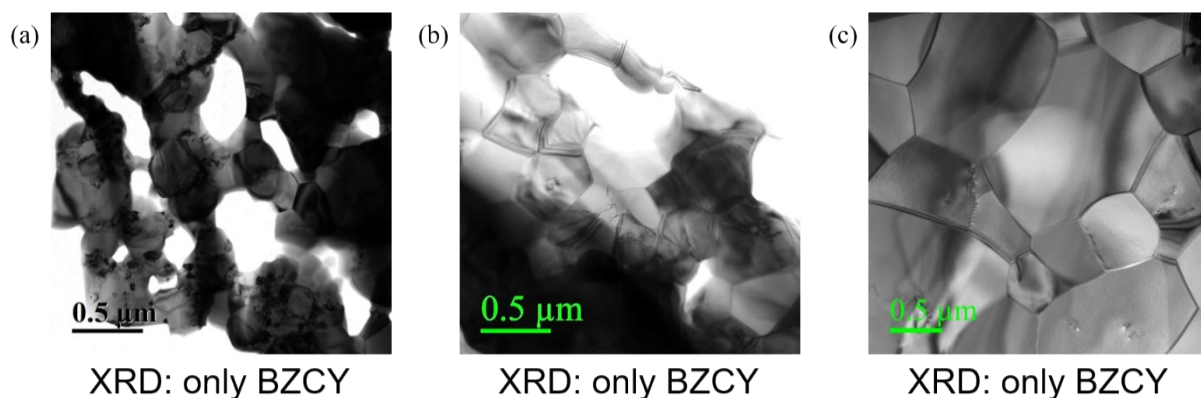

Figure S8: BF images from quenched BZCY with 2.0 wt% NiO addition samples sintered at 1350 °C for (a) 10 min, (b) 30 min and (c) 4 h.

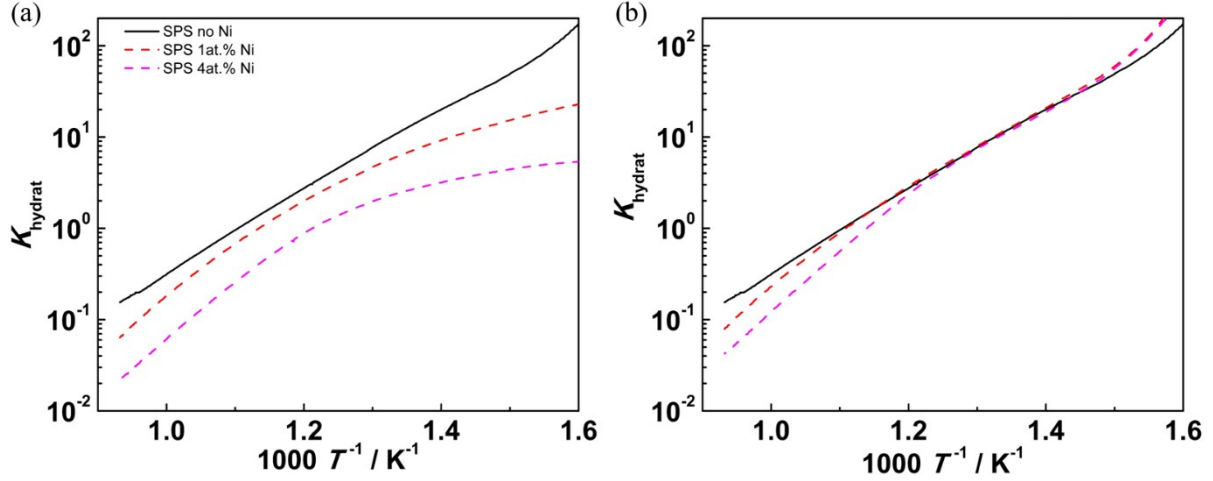

Figure S9: Van't Hoff plots for Ni-free and substitutional-Ni samples, (a)  $K_{hydrat}$  calculated with nominal acceptor concentration. (b) Calculated with effective acceptor concentration.

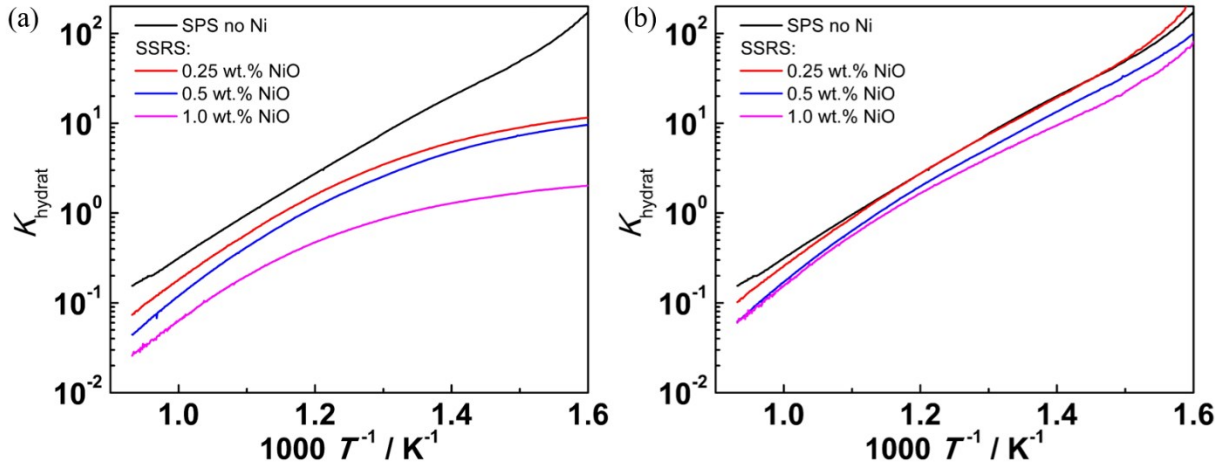

Figure S10: Van't Hoff plots with effective dopant concentration for different excess NiO addition. (a)  $K_{hydrat}$  calculated with nominal acceptor concentration. (b) Calculated with effective acceptor concentration; the linear fitting temperature range for  $\Delta H^\circ$  and  $\Delta S^\circ$  is 350 – 800 °C.

Note that for the Ni-excess samples in Fig. S10a the bending starts already at much higher temperatures (below  $\approx 570$  °C) compared to the samples with substitutional Ni in Fig. S9a (only below  $\approx 420$  °C). The stronger bending corresponds to lower effective acceptor concentrations, cf. Fig. 10c in the main paper.

**Procedure for  $[A'_{eff}]$  determination:** The plateau which the proton uptake approaches at 300°C (Fig. 10a,b) gives already a rough estimate of  $[A'_{eff}]$  (when the proton concentration approaches saturation,  $[OH_O^\bullet] = [A'_{eff}]$  holds). The actual  $[A'_{eff}]$  values of Fig. 10c were determined from this first estimate and the condition that the van 't Hoff plot should become as straight as possible. The use of a modified electroneutrality condition with  $[A'_{eff}]$

$$2[V_O^{\oplus}] + [OH_O^\bullet] = [A'_{eff}]$$

yields a modified expression for the mass action constant:

$$K_{hydrat} = \frac{2[\text{OH}_\text{O}^\text{g}]^2}{p\text{H}_2\text{O}([\text{A}'_{\text{eff}}][\text{OH}_\text{O}^\text{g}](3-[\text{A}'_{\text{eff}}]/2-[\text{OH}_\text{O}^\text{g}])}$$

The  $\Delta H^0$  and  $\Delta S^0$  values of Fig. 11 in the main paper were determined by fitting the van 't Hoff plots (employing  $[\text{A}'_{\text{eff}}]$ ) in the range of 350-800 °C. Since the van 't Hoff plots (Fig. S9,10) have some slight deviations from perfect linearity, choosing a different  $T$  range for the fitting slightly changes also the  $\Delta H^0$  and  $\Delta S^0$  values. Table S3 compares the results for the 350-800 °C and 500-800 °C fitting ranges. While the high- $T$  range leads to systematically more negative  $\Delta H^0$  and  $\Delta S^0$  values, the trends displayed in Fig. 11 of the main paper remain unaffected. The choice of the fitting range is always a balance; at high  $T$   $K_{hydrat}$  is potentially more affected by uncertainties in the determination of the absolute proton concentration from the dry/humid switching, while at lower  $T$  (high  $K_{hydrat}$ ) the uncertainty in  $[\text{A}'_{\text{eff}}]$  may have a stronger effect. Thus it is most important to treat all samples on a equal basis as done here.

Table S3: Comparison of  $\Delta H^0$  and  $\Delta S^0$  values obtained by different fitting ranges of the van 't Hoff plots

| sample                | $\Delta H^0$ / kJ/mol              | $\Delta S^0$ / J/molK | $\Delta H^0$ / kJ/mol      | $\Delta S^0$ / J/molK |
|-----------------------|------------------------------------|-----------------------|----------------------------|-----------------------|
|                       | fitted in 350-800 °C range Fig. 11 |                       | fitted in 500-800 °C range |                       |
| SPS no Ni             | -85                                | -94                   | -89                        | -99                   |
| SSRS 0.25wt% NiO      | -88                                | -98                   | -98                        | -109                  |
| SSRS 0.5wt% NiO       | -91                                | -105                  | -101                       | -116                  |
| SSRS 1wt% NiO         | -88                                | -99                   | -97                        | -112                  |
| SPS Ni on B 0.25wt%   | -94                                | -106                  | -108                       | -119                  |
| SPS Ni on B site 1wt% | -105                               | -121                  | -121                       | -138                  |
